# Supplementary material
Source: MDPI journal article supplement (https://www.mdpi.com/2071-1050/6/7/3993)
Supplement: s1 [file s1]

## Sheet: Table 1a
Supplementary Table 1a. Minimum Set of Lists Contained within LOLI Used to Assign Environmental Hazards in the CSI
Hazard Category	Hazard Assignment Approach	Minimum Set of Lists within LOLI1
Acute Aquatic Toxicity Categories 1, 2, and 3	A component is assigned to the relevant acute aquatic toxicity category if it is present on the Minimum Set of LOLI lists shown in the next column OR	EU - GHS - SV - CLP (1272/2008) - Hazardous to the Aquatic Environment - Acute
		Japan - GHS - SV - Hazardous to the Aquatic Environment - Acute
		New Zealand - GHS - SV - Hazardous to the Aquatic Environment - Acute
	A component is assigned to the relevant acute aquatic toxicity category based on acute toxicity data obtained from the Minimum Set of Lists shown in the next column:4 Category 1: Acute Toxicity < 1 mg/L Category 2: 1 mg/L < Acute Toxicity < 10 mg/L Category 3:10 mg/L < Acute Toxicity < 100 mg/L No Hazards: Acute Toxicity > 100 mg/L	Ecotoxicity - Freshwater Fish - Acute Toxicity Data
		Ecotoxicity - Water Flea - Acute Toxicity Data
		Ecotoxicity - Freshwater Algae - Acute Toxicity Data
Chronic Aquatic Toxicity Categories 1, 2, 3, and 4	A component is assigned to the corresponding acute aquatic toxicity category AND the biodegradation/persistent category AND the bioaccumulation category if it is present on the Minimum Set of Lists shown in the next column, unless data are available for that component to demonstrate that it is not bioaccumulative or persistent. A chronic aquatic toxicant category 4 is not scored as an acute toxic…	EU - GHS - SV - CLP (1272/2008) - Hazardous to the Aquatic Environment - Chronic
		Japan - GHS - SV - Hazardous to the Aquatic Environment - Chronic
		New Zealand - GHS - SV - Hazardous to the Aquatic Environment - Chronic
Ozone Depleting Substance (ODS)	A component is assigned to the ODS category if it is present on the Minimum Set of Lists shown in the next column.	U.S. - CAA (Clean Air Act) - Class I Ozone Depletors
		U.S. - CAA - Class II Ozone Depletors
		EU - Substances Depleting the Ozone layer (1005/2009) - Annex I Substances
		EU - Substances Depleting the Ozone layer (1005/2009) - Annex II Parts A and B Substances
		UNEP (United Nations Environment Programme) - Montreal Protocol Ozone Depletors - Annex A - Groups I and II
		UNEP - Montreal Protocol Ozone Depletors - Annex B - Groups I, II, and III
		UNEP - Montreal Protocol Ozone Depletors - Annex C - Groups I, II, and III
		UNEP - Montreal Protocol Ozone Depletors - Annex E
Bioaccumulation	A component is assigned to the bioaccumulative category if it is present on the Minimum Set of Lists shown in the next column OR considered a Chronic Aquatic Toxicant (in the absence of BCF and log Kow data below) OR Based on a BCF > 500 or log Kow > 4.5 (in the absence of BCF) obtained from the Minimum Set of Lists shown in the next column.	U.S. - CWA (Clean Water Act) - Bioaccumulative Chemicals of Concern (BCCs)
		Physical Properties - Bioconcentration Factors (BCFs)
		Physical Properties - Coefficient of Octanol/Water Distribution (Kow)
Volative Organic Compounds (VOCs)2	A component is assigned to the VOC category if it is present on the Minimum Set of Lists shown in the next column. This hazard category applies only to organic substances.	U.S. - CAA - Volatile Organic Compounds (VOCs) in SOCMI
Hazardous Air Pollutants (HAPs)2	A component is assigned to the HAP category if it is present on the Minimum Set of Lists shown in the next column.	U.S. - CAA - 1990 Hazardous Air Pollutants
		U.S. - CAA - HON Rule - Organic HAPs
		Japan - Air Pollution Control Law - HAPs
Hazardous Water Pollutants (HWPs)2	A component is assigned to the HWP category if it is present on the Minimum Set of Lists shown in the next column.	U.S. - CWA - Hazardous Substances
		U.S. - CWA - Priority Pollutants
Endocrine Disruptors2	A component is assigned to the Endocrine Disruptor category if it is present on the Minimum Set of Lists shown in the next column.	EU - Endocrine Disrupters - Ranked Priority List - Overall Categorizations
		EU - Endocrine Disrupters - Ranked Priority List - Wildlife Categorizations
		EU - Endocrine Disrupters - Ranked Priority List - Human Health Categorizations
Biodegradation - Persistent3	A component is assigned to the Biodegradation-Persistent category if it is present on the Minimum Set of Lists shown in the next column OR If results from an OSPAR HOCNF-accepted ready biodegradation study (e.g., OECD 301 A-F or OECD 306) or inherent biodegradation study (e.g., OECD 302 A-C) show biodegradability of <20%. This hazard category applies only to organic components.	EU - Persistent Organic Pollutants (Decision 2006/507/EC) - Stockholm Convention
		EU - Persistent Organic Pollutants (850/2004) - Annex I - Substances Subject to Prohibitions
		EU - Persistent Organic Pollutants (850/2004) - Annex III - Substances Subject to Release Reduction Provisions
Biodegradation - Inherent3	A component is assigned to the Biodegradation-Inherent category if results from an OSPAR HOCNF-accepted ready biodegradation study show biodegradation of >20% to <60%. There are no lists on the Minimum Set of Lists to make this assignment. This hazard category applies only to organic components.	Not available
No Hazards	A component is assigned to the No Hazard category based on professional judgment of available hazard category information.	Not applicable
No Data Available	A component is assigned to the No Data Available category based on lack of information on the hazard categories.	Not applicable
Notes:
(1) Underlined lists represent empirical data that should be compared against the respective definitions. The Minimum Set of Lists is updated annually based on changes to the LOLI database. This version of the Minimum Set of Lists was revised in January 2013.
(2) These environmental hazard categories are not addressed by the GHS.
(3) The definitions and criteria for these categories deviate from those defined in the GHS, and are based on definitions presented in the OSPAR HOCNF (OSPAR, 2000).
(4) Acute Toxicity data include: 96 hr LC50 (fish) OR 48 hr EC50 (crustacea) OR 72 or 96 hr ErC50 (algae or other aquatic plants).

## Sheet: Table 1b
Supplementary Table 1b. Minimum Set of Lists Contained within LOLI Used to Assign Physical Hazards in the CSI
Hazard Category1	Hazard Assignment Approach	Minimum Set of Lists within LOLI2
Explosive	A component is assigned to the explosive category if it is present on the Minimum Set of Lists shown in the next column.	EU - GHS - SV - CLP (1272/2008) - Explosives
		EU - CLP (1272/2008) - Annex VI - Table 3.1 - Classifications - Explosives
		Japan - GHS - SV - Explosives
		US - BATF - List of Explosive Materials
Pyrotechnic	A component is assigned to the pyrotechnic category if it is present on the Minimum Set of Lists shown in the next column.	EU - GHS - SV - CLP (1272/2008) - Explosives
		EU - CLP (1272/2008) - Annex VI - Table 3.1 - Classifications - Explosives
		Japan - GHS - SV - Explosives
		US - BATF - List of Explosive Materials
Flammable Gas	A component is assigned to the flammable gas category if it is present on the Minimum Set of Lists shown in the next column.	EU - GHS - SV - CLP (1272/2008) - Flammable Gases
		EU - CLP (1272/2008) - Annex VI - Table 3.1 - Classifications - Flammable Gas
		EU - CLP (1272/2008) - Annex VI - Table 3.1 - Classifications - Flammable Aerosol
		Japan - GHS - Flammable Gases
		New Zealand - GHS - SV - Flammable Gases
Oxidizing Gas	A component is assigned to the oxidizing gas category if it is present on the Minimum Set of Lists shown in the next column.	EU - GHS - SV - CLP (1272/2008) - Oxidising Gases
		EU - CLP (1272/2008) - Annex VI - Table 3.1 - Classifications - Oxidizing Gas
		Japan - GHS - Oxidizing Gases
		New Zealand - GHS - SV - Oxidising Gases
Gases Under Pressure	A component is assigned to the gases under pressure category if it is present on the Minimum Set of Lists shown in the next column.	EU - GHS - SV - CLP (1272/2008) - Gases Under Pressure
		EU - CLP (1272/2008) - Annex VI - Table 3.1 - Classifications - Gases under Pressure
		Japan - GHS - Gases Under Pressure
Flammable Liquid Categories 1, 2, 3, and 4	A component is assigned to the relevant flammable liquid category if it is present on the Minimum Set of Lists shown in the next column.	EFFA – GHS –SV-Flammable Liquids
		EU - GHS - SV - CLP (1272/2008) - Flammable Liquids
		EU - CLP (1272/2008) - Annex VI - Table 3.1 - Classifications - Flammable Liquid
		Japan - GHS - Flammable Liquids
		Korea - GHS - Flammable Liquids
		New Zealand - GHS - SV - Flammable Liquids
Flammable Solid	A component is assigned to the flammable solid category if it is present on the Minimum Set of Lists shown in the next column.	EFFA – GHS –SV-Flammable Solids
		EU - GHS - SV - CLP (1272/2008) - Flammable Solids
		EU - CLP (1272/2008) - Annex VI - Table 3.1 - Classifications - Flammable Solid
		Japan - GHS - Flammable Solids
		Korea - GHS - Flammable Solids
		New Zealand - GHS - SV - Flammable Solids
Self-Reactive Substance	A component is assigned to the self-reactive substance category if it is present on the Minimum Set of Lists shown in the next column.	EU - GHS - SV - CLP (1272/2008) - Self-Reactive Substances and Mixtures
		EU - CLP (1272/2008) - Annex VI - Table 3.1 - Classifications - Self-Reactive Substance or Mixture
		Japan - GHS - Self-Reactive Substances and Mixtures
		New Zealand - GHS - SV - Self-Reactive Substances and Mixtures
Pyrophoric (Liquids and Solids)	A component is assigned to the pyrophoric category if it is present on the Minimum Set of Lists shown in the next column.	EU - GHS - SV - CLP (1272/2008) - Pyrophoric Liquids
		EU - GHS - SV - CLP (1272/2008) - Pyrophoric Solids
		EU - CLP (1272/2008) - Annex VI - Table 3.1 - Classifications - Pyrophoric Liquid
		EU - CLP (1272/2008) - Annex VI - Table 3.1 - Classifications - Pyrophoric Solid
		Japan - GHS - Pyrophoric Liquids
		Japan - GHS - Pyrophoric Solids
		New Zealand - GHS - SV - Pyrophoric Substances
Self-Heating Substance	A component is assigned to the self-heating substance category if it is present on the Minimum Set of Lists shown in the next column.	EU - GHS - SV - CLP (1272/2008) - Self-Heating Substances and Mixtures
		EU - CLP (1272/2008) - Annex VI - Table 3.1 - Classifications - Self-Heating Substance or Mixture
		Japan - GHS - Self-Heating Substances and Mixtures
		New Zealand - GHS - SV - Self-Heating Substances and Mixtures
Emit Flammable Gases in Contact with Water	A component is assigned to the "emit flammable gases in contact with water" category if it is present on the Minimum Set of Lists shown in the next column.	EU - GHS - SV - CLP (1272/2008) - Substances and Mixtures which, in Contact with Water, Emit Flammable Gases
		EU - CLP (1272/2008) -Annex VI-Table 3.1-Classifications-Substance or Mixture which in Contact with Water Emits Flammable Gas
		Japan - GHS - Substances and Mixtures Which in Contact with Water Emit Flammable Gases
		New Zealand - GHS - SV - Substances and Mixtures which, in Contact with Water, Emit Flammable Gases
Oxidizing Liquid	A component is assigned to the oxidizing liquid category if it is present on the Minimum Set of Lists shown in the next column.	EU - GHS - SV - CLP (1272/2008) - Oxidizing Liquids
		EU - CLP (1272/2008) - Annex VI - Table 3.1 - Classifications - Oxidizing Liquid
		Japan - GHS - Oxidizing Liquids
		New Zealand - GHS - SV - Oxidizing Liquids
Oxidizing Solid	A component is assigned to the oxidizing solid category if it is present on the Minimum Set of Lists shown in the next column.	EU - GHS - SV - CLP (1272/2008) - Oxidizing Solids
		EU - CLP (1272/2008) - Annex VI - Table 3.1 - Classifications - Oxidizing Solid
		Japan - GHS - Oxidizing Solids
Organic Peroxide	A component is assigned to the organic peroxide category if it is present on the Minimum Set of Lists shown in the next column.	EU - GHS - SV - CLP (1272/2008) - Organic Peroxides
		EU - CLP (1272/2008) - Annex VI - Table 3.1 - Classifications - Organic Peroxide
		Japan - GHS - Organic Peroxides
		New Zealand - GHS - SV - Organic Peroxides
		US - DOT (Department of Transportation) - Organic Peroxides Table
Corrosive to Metals	A component is assigned to the corrosive to metals category if it is present on the Minimum Set of Lists shown in the next column.	EU - GHS - SV - CLP (1272/2008) - Corrosive to Metals
		EU - CLP (1272/2008) - Annex VI - Table 3.1 - Classifications - Substance or Mixture Corrosive to Metals
		Japan - GHS - Corrosive to Metals
		New Zealand - GHS - SV - Corrosive to Metals
No Hazards	A component is assigned to the No Hazard category based on professional judgment of available hazard category information.	Not applicable
No Data Available	A component is assigned to the No Data Available category based on lack of information on the hazard categories.	Not applicable
Notes:
(1) Note that a component will be scored in one phase only - i.e., a liquid, solid, OR gas (thus, as an example, a component cannot be assigned to both the flammable gas and flammable liquid categories).
(2) The Minimum Set of Lists is updated annually based on changes to the LOLI database. This version of the Minimum Set of Lists was revised in January 2013.

## Sheet: Table 1c
Table S1. Minimum set of lists contained within LOLI used to assign health hazards in the CSI.
Hazard Category	Hazard Assignment Approach	Minimum Set of Lists within LOLI 1
Carcinogenicity (Categories 1 and 2)	A component is assigned to the Carcinogenicity Cat. 1 category if it is classified as: 1A or 1B (EU, Japan, NZ); 1 or 2A (IARC); A1 (ACGIH); A or B (US EPA); or as a "Known" (NTP), "Presumed" or "Probable" (US EPA, NIOSH) human carcinogen on any lists in the next column, OR (see below) A component is assigned to Carcinogenicity Cat. 2 category if it is classified as: Category 2 (EU, Japan, NZ), 2…	ACGIH - Threshold Limit Values - Carcinogens
		EU - CLP (1272/2008) - Annex VI - Table 3.1 - Classifications - Carcinogenicity
		Japan - GHS - Carcinogenicity
		Japan - GHS - SV - Carcinogenicity
		Japan - Recommended Exposure Limits - Carcinogenicity Class
		New Zealand - GHS - SV - Carcinogenicity
		New Zealand - Workplace Exposure Limits - Carcinogens
		U.S. - EPA - IRIS Carcinogenicity Assessment
		IARC - Group 1 (Carcinogenic to Humans)
		IARC - Group 2A (Probably Carcinogenic to Humans)
		IARC - Group 2B (Possibly Carcinogenic to Humans)
		Japan - ISHL Designated Carcinogens
		EU - REACH (1907/2006) - Appendix 1 - Carcinogens: Category 1A (Table 3.1) / Category 1 (Table 3.2)
		EU - REACH (1907/2006) - Appendix 2 - Carcinogens: Category 1B (Table 3.1) / Category 2 (Table 3.2)
		NIOSH - Pocket Guide - Potential Occupational Carcinogens
		NTP (National Toxicology Program) - Report on Carcinogens - Known Human Carcinogens
		NTP (National Toxicology Program) - Report on Carcinogens - Reasonably Anticipated to be Human Carcinogens
Mutagenicity	A component is assigned to the Mutagenicity category if it is present on the Minimum Set of Lists (Category 1A, 1B, or 2) shown in the next column.	EU - CLP (1272/2008) - Annex VI - Table 3.1 - Classifications - Germ Cell Mutagenicity
		EU - GHS - SV - CLP (1272/2008) - Germ Cell Mutagenicity
		Japan - GHS - Germ Cell Mutagenicity
		Japan - GHS - SV - Germ Cell Mutagenicity
		Japan - ISHL Mutagens - Existing Chemicals
		Japan - ISHL Mutagens - New Chemicals
		New Zealand - GHS - SV - Germ Cell Mutagenicity
Reproductive Toxicity	A component is assigned the reproductive toxicant category if it is present on the Minimum Set of Lists (Category 1A, 1B or 2) shown in the next column.	EU - CLP (1272/2008) - Annex VI - Table 3.1 - Classifications - Reproductive Toxicity
		EU - GHS - SV - CLP (1272/2008) - Reproductive Toxicity
		EU - REACH (1907/2006) - Appendix 5 - Reproductive Toxicants: Category 1A (Table 3.1) / Category 1 (Table 3.2)
		EU - REACH (1907/2006) - Appendix 6 - Reproductive Toxicants: Category 1B (Table 3.1) / Category 2 (Table 3.2)
		Japan - GHS - SV - Reproductive Toxicity
		Japan - GHS - Toxic to Reproduction
		New Zealand - GHS - SV - Reproductive Toxicity
		US - California - Proposition 65 - Reproductive Toxicity - Female
		US - California - Proposition 65 - Reproductive Toxicity - Male
Sensitizer	A component is assigned to the sensitizer category if it is present on the Minimum Set of Lists (Category 1A or 1B) shown in the next column.	ACGIH - Threshold Limit Values - Sensitization (SEN) Notations
		AIHA - Workplace Environmental Exposure Levels (WEELs) - Skin Sensitizers
		EU - CLP (1272/2008) - Annex VI - Table 3.1 - Classifications - Respiratory or Skin Sensitization
		EU - GHS - SV - CLP (1272/2008) - Respiratory Sensitization
		EU - GHS - SV - CLP (1272/2008) - Skin Sensitization
		Japan - GHS - Respiratory Sensitizers
		Japan - GHS - Skin Sensitizers
		Japan - GHS - SV - Respiratory Sensitization
		Japan - GHS - SV - Skin Sensitization
		Japan - Recommended Exposure Limits - Sensitizers
		New Zealand - GHS - SV - Respiratory Sensitisation
		New Zealand - GHS - SV - Skin Sensitization
		New Zealand - Workplace Exposure Limits - Sensitizers
Acute Toxicity Categories 1, 2, 3, and 4	A component is assigned to the relevant acute toxicity category (1, 2, 3, or 4) if it is present on the Minimum Set of Lists shown in the next column, OR	EU - CLP (1272/2008) - Annex VI - Table 3.1 - Classifications - Acute Toxicity - Dermal
		EU - CLP (1272/2008) - Annex VI - Table 3.1 - Classifications - Acute Toxicity - Inhalation
		EU - CLP (1272/2008) - Annex VI - Table 3.1 - Classifications - Acute Toxicity - Oral
		EU - GHS - SV - CLP (1272/2008) - Acute Toxicity - Dermal
		EU - GHS - SV - CLP (1272/2008) - Acute Toxicity - Inhalation
		EU - GHS - SV - CLP (1272/2008) - Acute Toxicity - Oral
		Japan - GHS - Acute Toxicity - Dermal
		Japan - GHS - Acute Toxicity - Inhalation - Dust and Mist
		Japan - GHS - Acute Toxicity - Inhalation - Gas
		Japan - GHS - Acute Toxicity - Inhalation - Vapor
		Japan - GHS - Acute Toxicity - Oral
		Japan - GHS - SV - Acute Toxicity - Dermal
		Japan - GHS - SV - Acute Toxicity - Inhalation - Dust and Mist
		Japan - GHS - SV - Acute Toxicity - Inhalation - Gas
		Japan - GHS - SV - Acute Toxicity - Inhalation - Vapour
		Japan - GHS - SV - Acute Toxicity - Oral
		New Zealand - GHS - SV - Acute Toxicity - Dermal
		New Zealand - GHS - SV - Acute Toxicity - Inhalation
		New Zealand - GHS - SV - Acute Toxicity - Oral
		WHO (World Health Organization) - GHS Acute Toxicity Hazard Categories of Pesticides
	Based on a component's acute toxicity obtained from the LOLI list in the next column and benchmark cut-offs.2	Toxicology Data - Selected LD50s and LC50s
Corrosivity Categories 1 and 2	Category 1: A component is assigned to the Corrosivity Category 1 if the component is present on the Minimum Set of Lists in the next column as "Serious Eye Damage/Eye Irritation" and/or "Eye Dam. Category 1" OR "Skin Corr. Category 1A [or 1B]" and/or "Causes severe skin burns and eye damage."	EU - CLP (1272/2008) - Annex VI - Table 3.1 - Classifications - Serious Eye Damage/Eye Irritation
		EU - CLP (1272/2008) - Annex VI - Table 3.1 - Classifications - Skin Corrosion/Irritation
	Category 2: A component is assigned to the Corrosivity Category 1 if the component is present on the Minimum Set of Lists in the next column as "Eye Irrit. Category 2" and/or "Causes eye irritation" OR "Skin Corr. Category 2" and/or "Causes skin irritation" OR if the component has a pH ≤ 2, or a pH ≥ 11.5, as indicated on the LOLI list in the next column.3	EU - GHS - SV - CLP (1272/2008) - Serious Eye Damage/Eye Irritation
		EU - GHS - SV - CLP (1272/2008) - Skin Corrosion/Irritation
		Japan - GHS - Serious Eye Damage/Irritation
		Japan - GHS - Skin Corrosion/Irritation
		Japan - GHS - SV - Serious Eye Damage/Eye Irritation
		Japan - GHS - SV - Skin Corrosion/Irritation
		Japan - ISHL Corrosive Liquids
		New Zealand - GHS - SV - Serious Eye Damage/Eye Irritation
		New Zealand - GHS - SV - Skin Corrosion/Irritation
		Physical Properties - pH Values3
Acute Target Organ Toxicity	A component is assigned to the acute target organ toxicant category if it is present on the Minimum Set of Lists (Category 1 or 2) shown in the next column.	EU - CLP (1272/2008) - Annex VI - Table 3.1 - Classifications - Specific Target Organ Toxicity - Single Exposure
		EU - GHS - SV - CLP (1272/2008) - Specific Target Organ Toxicity - Single Exposure
		Japan - GHS - Specific Organ Systemic Toxicity Following Single Exposure
		Japan - GHS - SV - Specific Target Organ Toxicity - Single Exposure
		New Zealand - GHS - SV - Specific Target Organ Toxicity - Single Exposure
		U.S. - California - Air Toxics Hot Spots Act - Acute Hazard Index Target Organs
Chronic Target Organ Toxicity	A component is assigned to the chronic target organ toxicant category if it is present on the Minimum Set of Lists (Category 1 or 2; or unspecified) shown in the next column.	EU - CLP (1272/2008) - Annex VI - Table 3.1 - Classifications - Specific Target Organ Toxicity - Repeated Exposure
		EU - GHS - SV - CLP (1272/2008) - Specific Target Organ Toxicity - Repeated Exposure
		Japan - GHS - SV - Specific Target Organ Toxicity - Repeated Exposure
		New Zealand - GHS - SV - Specific Target Organ Toxicity - Repeated Exposure
		U.S. - EPA - IRIS Oral Reference Dose (RfD) Information
		U.S. - EPA - IRIS Inhalation Reference Concentration (RfC) Information
		U.S. - California - Air Toxics Hot Spots Act - Chronic Hazard Index Target Organs
Aspiration Hazard	A component is assigned to the aspiration hazard category if it is present on the Minimum Set of Lists shown in the next column.	EU - CLP (1272/2008) - Annex VI - Table 3.1 - Classifications - Aspiration Hazard
		EU - GHS - SV - CLP (1272/2008) - Aspiration Hazard
		Japan - GHS - Aspiration Hazards
		Japan - GHS - SV - Aspiration Hazard
No Hazards	A component is assigned to the No Hazard category based on professional judgment of available hazard category information.	Not applicable
No Data Available	A component is assigned to the No Data Available category based on lack of information on the hazard categories.	Not applicable
Notes:
1 Underlined lists represent empirical data that should be compared against the respective definitions. The Minimum Set of Lists is updated annually based on changes to the LOLI database. This version of the Minimum Set of Lists was revised in January 2013.
2 Acute Toxicity Categories based on acute toxicity data:
Category 1
Oral LD50 ≤ 5 mg/kg
Dermal LD50 ≤ 50 mg/kg
Inhalation (Gas) LC50 ≤ 100 ppm
Inhalation (Vapor) LC50 ≤ 0.5 mg/L
Inhalation (Dust/Mist) LC50 ≤ 0.05 mg/L
3 Used only if the component is not listed on the other Minimum Set of Lists for this hazard category.
